# Supplementary material for: Effect of Chitosan loading towards structural, optoelectronic and photocatalytic degradation of flakes like CuO-Chitosan nanocomposite
Source: Research Square preprint supplement (doi:10.21203/rs.3.rs-7982430/v1), 2025-11-13
Supplement: Supplementary file 1 [file a9c0732ad47dfc0f3b9795c9.docx]

**Supporting Information**

**Effect of Chitosan loading towards structural, optoelectronic and photocatalytic degradation of flakes like CuO-Chitosan nanocomposite**

Laraib Bibia, Saba Afzal*a, Madinaa, , Ishrat Fatima b ,Rabia Naeem*b, Bibi Sherinoa, Huma Tareena

aDepartment of Chemistry, Sardar Bahadur Khan Women’s University, Quetta, Pakistan.

bDepartment of Chemistry Government College University Lahore, Pakistan

*Corresponding authors: Saba Afzal*a , Rabia Naeem*b

[sag_dec@hotmail.com](mailto:sag_dec@hotmail.com), [rabianaeem@gcu.edu.pk](mailto:rabianaeem@gcu.edu.pk)

Contact No: 009233239495


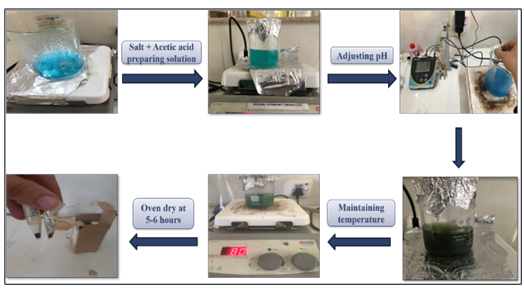


**Fig.S1.** Synthesis of CuO NPs at different temperatures (30 °C, 60 °C, 80 °C).


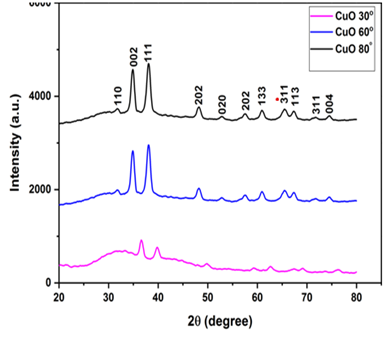


**Fig.S2** XRD pattern of CuO NPs (30 °C, 60 °C and 80 °C)


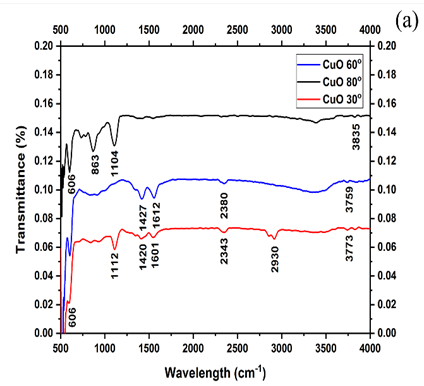


**Fig S3** FTIR spectra of CuO NPs samples


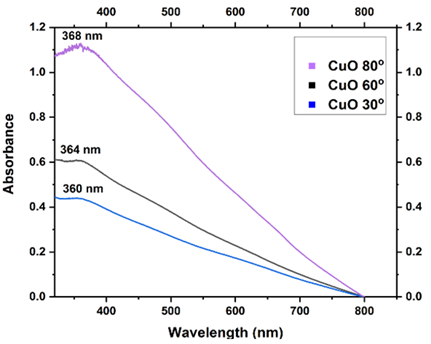


**Fig.S4** UV-Visible spectra of CuO NPs synthesized on various temperatures (30 °C, 60 °C and 80 °C),
